**1 The Y-chromosome clarifies the evolutionary history of *Sus scrofa* by**  
**2 large-scale deep genome sequencing**

3

4 Huashui Ai<sup>1,2</sup>, Jun Ren<sup>1</sup>, Junwu Ma<sup>1</sup>, Zhiyan Zhang<sup>1</sup>, Wanbo Li<sup>1</sup>, Bin Yang<sup>1</sup> and  
 5 Lusheng Huang<sup>1,2</sup>.

6 <sup>1</sup> State Key Laboratory for Swine Genetic Improvement and Production Technology,  
 7 Jiangxi Agricultural University, 330045, Nanchang, China

8 <sup>2</sup> Corresponding authors: Lusheng Huang (lushenghuang@hotmail.com) or Huashui  
 9 Ai (aihsh@hotmail.com)

10

11 Running title: Chromosome Y clarifies pig evolutionary history

12 Keywords: Chromosome Y; evolutionary history; pig; genome sequencing

13

14

15

## 16    **Abstract**

17    The genetics and evolution of sex chromosomes are largely distinct from autosomes  
18    and mitochondrial DNA (mtDNA). The Y chromosome offers unique genetic  
19    perspective on male-line inheritance. Here, we uncover novel evolutionary history of  
20    *Sus scrofa* based on 205 high-quality genomes from worldwide-distributed different  
21    wild boars and domestic pig breeds. We find that only two haplotypes exist in the  
22    distal and proximal blocks of at least 7.7 Mb on chromosome Y in pigs across  
23    European and Asian continents. And the times of most recent common ancestors  
24    ( $T_{MRC A}$ ) within both haplotypes, approximately 0.14 and 0.10 million years, are far  
25    smaller than their divergence time of around 1.07 million years. What's more, the  
26    relationship between Sumatran and Eurasian continent *Sus scrofa* is much closer than  
27    that we knew before. And surprisingly, European pigs share the same haplotype with  
28    many Chinese pigs, which is not consistent with their deep splitting status on  
29    autosome and mtDNA. Further analyses show that the haplotype in Chinese pigs was  
30    likely introduced from European wild boars via ancient gene flow before pig  
31    domestication about 24k years ago. Low mutation rates and no recombination in the  
32    distal and proximal blocks on chromosome Y help us detect this male-driven ancient  
33    gene flow. Taken together, our results update the knowledge of pig demography and  
34    evolution, and might shed insight into the genetics and evolution studies on  
35    chromosome Y in other mammals.

36

## 37 **Introduction**

38 The pig (*Sus scrofa*) provides human a main source of animal protein and serves as a  
 39 biomedical model for human disease (Groenen et al. 2012). Since pigs are usually  
 40 raised to yield meat and feed a majority of the world population, lots of studies have  
 41 been conducted to reveal the genetic mechanisms for the complex economic traits in  
 42 pigs, such as growth and fatness (Andersson et al. 1994), meat quality (Milan et al.  
 43 2000; Ma et al. 2014) and reproduction (Uimari et al. 2011). On the other hand, pigs  
 44 have experienced a long period of breeding in yards or fields adjunct to human  
 45 agricultural societies; they evolved similar eating pattern and dietary structure to  
 46 human beings (Fang et al. 2012). And pigs share high resemblances with humans in  
 47 terms of anatomy and physiology. It is generally believed that pigs can be treated as  
 48 the ideal animal model for studying human microbial infectious diseases (Meurens et  
 49 al. 2012), or as the promising candidate for development of tissue engineering  
 50 techniques and xenotransplantation (Eventov-Friedman et al. 2006; Ekser et al. 2012).  
 51 Therefore pig, as an important domestic animal, is very close related to human.  
 52 Elucidating pig evolutionary history increases our cognition to pigs, provides insights  
 53 to the development of two foundational functions of pigs, and helps us better  
 54 understand the demographic history of humans.

55 Currently, pig demography and evolutionary history have been adequately revealed  
 56 by lots of great works, which mainly included three aspects of zooarchaeological  
 57 analyses, mtDNA or ancient mtDNA studies, and autosomal genomic researches. It is  
 58 widely accepted that *Sus scrofa* emerged in Island South East Asia (ISEA) during the  
 59 climatic fluctuations of the early Pliocene about 3 to 4 million years ago (Mya) and  
 60 over the past one million year colonized almost the entire Eurasian continent (Frantz  
 61 et al. 2013; Groenen 2016). On the northern parts of Sumatran Island, one of

62 Southeast Asian islands, a wild boar population is also found, which split from  
 63 Eurasian wild boar around 1.6 to 2.4 Mya (Frantz et al. 2013; Groenen 2016). The  
 64 European and Asian wild boar populations diverged around 1 Mya, and North and  
 65 South Chinese *Sus scrofa* populations separated from each other during the Ionian  
 66 stage approximately 0.6 Mya (Groenen et al. 2012; Frantz et al. 2013). Pigs were  
 67 domesticated at least at two locations (Anatolia and China) ~10k years ago (Larson et  
 68 al. 2005; Larson et al. 2007; Frantz et al. 2013), and gradually formed a variety of  
 69 breeds in Europe and Asia (Kijas and Andersson 2001; Wang et al. 2011; Ottoni et al.  
 70 2013). While during and after domestication of pigs, long-term gene flows or  
 71 hybridization between wild boars and domestic pigs have been evidenced (Giuffra et  
 72 al. 2000; Frantz et al. 2015). Nowadays Eurasia has the most rich pig resources, and  
 73 about one third of worldwide pig breeds have adapted to divergent environment of  
 74 China (Wang et al. 2011). Recently, a complex pattern of admixture and introgression  
 75 between European and Asian domestic pigs, and African and American feral pigs has  
 76 been well documented, but most of pigs colonizing the American, African and  
 77 Australian continents originate from two highly distinct source populations of  
 78 European and Asian local pigs (Ramirez et al. 2009; White 2011; Noce et al. 2015).

79 These above studies about pig demography and evolution are mainly focused on  
 80 zooarchaeological evidences and genetic variations on autosomes and mtDNA. Few  
 81 works were conducted from the perspectives of whole sex chromosomes, especially  
 82 for the Y-chromosome, possibly due to lacking of enough genomic information. On  
 83 the X-chromosome, we have previously found an interesting event of possible ancient  
 84 interspecies introgression by sequencing 69 Chinese local pigs (Ai et al. 2015), which  
 85 made an important complement to pig evolutionary history. With the development of  
 86 sequencing technology, 13 de novo assembled pig genomes (Fang et al. 2012;

87 Groenen et al. 2012; Li et al. 2013; Vamathevan et al. 2013; Li et al. 2016) were  
 88 available for public access. But the version of Build 10.2 reference genome was still  
 89 widely used due to comprehensive gene annotation and rich variants information.  
 90 More recently, an improved assembly and gene annotation of the pig X Chromosome  
 91 and a draft assembly of the pig Y Chromosome (VEGA62) were also generated by  
 92 sequencing BAC and fosmid clones from Duroc animals and incorporating  
 93 information from optical mapping and fiber-FISH (Skinner et al. 2016). These  
 94 improved assemblies provide us make a profound survey to the evolutionary history  
 95 of pigs from the perspectives of sex chromosomes, especially from the unique genetic  
 96 perspective on male-line inheritance.

97 In the current work, we obtained high-quality whole-genome sequence data of 202  
 98 pigs from divergent populations and three outgroups including *Phacochoerus*  
 99 *africanus*, *Sus verrucosus* and *Sus celebensis*. Based on variants of the Y-  
 100 chromosome, we presented a deep investigation for male-line evolutionary history in  
 101 pigs from the global, with assist of autosomal and mtDNA information.

102

103

104

105

106

107

108

# Results

We have previously sequenced 69 Chinese typical indigenous pigs to reveal the genetic basis for porcine local climate adaptation and possible ancient interspecies introgression on the X-chromosome (Ai et al. 2015). Here we increase 104 pigs for next-generation sequencing, download public data of 39 pigs and 3 outgroups, and combine our previous samples; we make a high-quality dataset of 205 individuals (**Fig. 1A, Supplemental Table S1**). All data was mapped into the *Sus scrofa* reference genome (build 10.2) using BWA (Li and Durbin 2009). A total of 48,745,075 SNPs were identified in the 205 genomes (**Supplemental Table S2**) using Platypus (Rimmer et al. 2014) under the criterion of minor allele frequencies (MAF) greater than 0.001 and call rates greater than 80%. All male data was remapped into the Y-chromosome (VEGA62) using Bowtie2 (Langmead and Salzberg 2012). On the new version of chromosome Y, a total of 49,103 SNPs were detected in the males using Platypus under the above criterion of  $MAF > 0.001$  and call rates  $> 80\%$ . These SNPs were used for subsequent demographic and evolutionary analyses.

## Demographic parameters inferred by autosomal data

We first constructed a neighbor-joining (NJ) tree for the above 205 animals using 47,009,938 SNPs on autosomes. All individuals from the same population gathered together, and European pigs defined a branch clearly separated from Chinese pigs in the NJ tree (**Fig. 1B**). Chinese wild boars clustered into one group, and Chinese domestic pigs were roughly categorized into four groups, corresponding to their geographical distributions: South China, West China, East China and North China (**Fig. 1B**). We then conducted principal components (Price et al. 2006), ADMIXTURE (Alexander et al. 2009) and Treemix (Pickrell and Pritchard 2012) analyses to assess population structure of these animals. European pigs formed an

independent lineage that was genetically distinct from Chinese pigs in both the ADMIXTURE results (**Fig. 1C**) and the principal components plot (**Fig. 1D**). The Treemix analysis inferred the deep divergence not only between Sumatran pigs and Eurasian pigs, but also between European and Chinese pigs, and North Chinese pigs showed closer relationship with European pigs than other Chinese pigs (**Fig. 1E**). We further inferred the history of population size of Sumatran, Chinese and European pigs using the multiple sequentially Markovian coalescent method (Schiffels and Durbin 2014). Obviously, the demographic profile of Sumatran pigs largely differed from those of Chinese and European pigs. But from the ancient time of the Last Glacial Maximum to the recent 1000 years, the curve of Sumatran pigs almost overlapped with the one of European wild boars. Interestingly, the demographic profiles of Chinese pigs began to diverge from those of European pigs about 0.3 Mya (**Fig. 1F**), and had experienced less severe decline in population size during the Last Glacial Maximum, which is consistent with the previous reports (Groenen et al. 2012; Frantz et al. 2013). Notably, all the test pigs had experienced a bottleneck effect from ~ 5000 to 2000 years ago, which was most severe than the past time. We hypothesized that the activities of human domestication or human hunting might contribute to the decrease of pig or wild boar across the global.

Altogether, these results based on the autosomal data support the previous conclusion that Chinese and European pigs represent two genetically divergent ancestral populations and Sumatran wild boars are largely different with Eurasian pigs (Larson et al. 2005; Groenen et al. 2012; Frantz et al. 2013).

# **Odd haplotype patterns of both sex chromosomes in Eurasian pigs**

We then made a close examination on sex chromosomes using 1,730,532 and 49,103 SNPs on chromosomes X and Y, respectively. As expected, the low-recombinant low-

159 mutation-rate region of 52 Mb (from 49 to 101 Mb on Build 10.2 reference genome)  
 160 on the X chromosome exhibits three different major haplotypes: one found in  
 161 European pigs and North Chinese wild boars; one found in pigs from South and West  
 162 China; and the recombinant haplotype between the two haplotypes was observed in  
 163 North, East and West Chinese domestic pigs (**Supplemental Fig. S1**). This new view  
 164 of the odd haplotype pattern on the X-chromosome is well accordant with our  
 165 previous finding (Ai et al. 2015). Unexpectedly, the distal and proximal region on the  
 166 Y chromosome of at least 7.7 Mb (hereafter referred to as the SSCY region) displayed  
 167 two different haplotypes in all tested Euroasian pigs (European pigs, n=30; Chinese  
 168 pigs, n=71; **Fig. 2A**). The SSCY region was defined as the region from 8.9 to 10.6 Mb  
 169 and from 39.5 to 43.5 Mb on the VEGA62 version of Y chromosome, meanwhile plus  
 170 a 2-Mb unmapped contig of Y chromosome. The two haplotypes exhibit a deep  
 171 divergence as reflected by pairwise nucleotide diversity (**Fig. 2B**) and the phylogenic  
 172 tree (**Fig. 2C**).

173 However to our surprise, the distribution pattern of these two haplotypes on the Y  
 174 chromosome in Eurasian pigs was different from the haplotype pattern on the X  
 175 chromosome. One haplotype was exclusively found in pigs across China and hence  
 176 denoted as Asian haplotype; while the other one was found in European pigs and  
 177 some Chinese pigs from North, South and West China, therefore designated as  
 178 Eurasian haplotype (**Fig. 2A**). We further investigated the geographical distribution of  
 179 the two haplotypes in a larger panel of 426 male pigs from 82 diverse populations  
 180 across Eurasia and America using six tagging SNPs representing the SSCY region  
 181 (**Fig. 2D and Supplemental Table S3**). Again, the Asian haplotype was observed  
 182 only in East Asian pigs including Chinese pigs, Korean wild boars and Russian  
 183 Primorsky wild boars; and the Eurasian haplotype was found in European and



Chinese pigs, as well as American pigs, which were originated from European pigs (Fig. 2D).

# **Demography and Evolutionary history inferred by the Y-chromosome**

We estimated the divergence time of the haplotypes on the SSCY region using a strict molecular clock implemented in BEAST (Drummond et al. 2012) under the GTR+ $\Gamma$ +I model. In the Bayesian tree, there is a clear split between European pigs with the Eurasian haplotype and Chinese pigs with the Asian haplotype (Fig. 2C). Their divergence time was estimated to be 1.07 million years (Table 1). However, the time of most recent common ancestors ( $T_{MRCA}$ ) of European and Chinese pigs with the Eurasian haplotype and of Chinese pigs with Asian haplotype were estimated to be only about 0.10 and 0.14 million years, which are unusually smaller than their splitting time (Table 1). And  $T_{MRCA}$  of Chinese pigs with the Eurasian haplotype was inferred to be 24k years with 95% confidence intervals from 16k to 30k years (Table 1). Also surprisingly, Sumatran wild boar showed much closer relationship to Chinese pigs with Asian haplotype with the splitting time of 0.90 million years (Table 1), which is much smaller than the time of 2.1 million years as previously reported using autosomal data (Frantz et al. 2013).

To learn more about the evolutionary history of chromosome Y, we further calculated nucleotide variability at the genomic level and within the SSCY region in these sequenced male animals. The SSCY region had a significantly lower level of nucleotide diversity in comparison with autosomes (Fig. 3), which is not likely caused by sex-biased genetic drift (Supplemental Table S4 and S5) and could be due to the absence of recombination and reduced mutation rates within this region. Moreover, nucleotide variability parameters including segregation sites, *theta* and *Pi* values were all lower in European pigs with the Eurasian haplotype than Chinese pigs with the

Asian haplotype (**Fig. 3, Supplemental Table S4 and S5**). This could be explained by the fact that European wild boars had suffered a more dramatically decrease of population size than Asian wild boars during the Last Glacial Maximum period (**Fig. 1F**). Of note, Chinese pigs having the Eurasian haplotype had ~ six-fold lower values of nucleotide variability than European pigs with this haplotype (**Supplemental Table S4 and S5**), and selection signal was not observed in these Chinese pigs as indicated by Tajima's D values (**Fig. 3, Supplemental Table S4 and S5**). A reasonable explanation for this observation is that the Eurasian haplotype in Chinese pigs is a European-originated genetic component and has been introgressed into Asian wild boars via an ancient gene flow before domestication approximately 24k years ago. This genetic component contributes to the current gene pool of a proportion of Chinese domestic pigs, possibly via a complicated human-mediated dispersal after pig domestication. Similar to our previous finding of the interspecies introgression on chromosome X (Ai et al. 2015), our ability to detect this ancient male-driven gene flow on chromosome Y is facilitated by the fact that the introgression fragment falls in a region without recombination and low mutation rates and thus can be maintained for a prolonged period. If the introgressed segment had not fallen in such a region, we would likely never have detected the unusual haplotype pattern as recombination and normal mutation rates may quickly degenerate the integrity of introgression fragments. Of note, this evolutionary pattern has not been observed on the Y-chromosome of other mammals like human (Poznik et al. 2016), dog (Shannon et al. 2015) and horse (Wallner et al. 2013).

## 232 Discussion

### 233 Chromosome Y clarifies the evolutionary history of *Sus scrofa*

234 In the present study, we show a previous unknown evolutionary history of the porcine  
 235 Y chromosome. In our findings, three key points surprise us. First, only two huge  
 236 different haplotypes were observed in the distal and proximal blocks of Chromosome  
 237 Y in a diverse panel of Eurasian pigs (**Fig. 2A**). The genomic and genetic analyses  
 238 reveal that these regions have two special evolutionary features: no recombination and  
 239 lower mutation rates, which have not been found in sex chromosomes of other  
 240 common mammals but only in pigs. Previously we found large region on  
 241 Chromosome X (48 Mb on the Wuzhishan reference X chromosome; 52 Mb on the  
 242 Build 10.2 version of Duroc reference X chromosome) harbors the characteristics of  
 243 low recombination and low mutation rates. We speculated that the enrichment of a 6-  
 244 kb poly(T) core sequence in the region might contribute to low recombination (Ai et  
 245 al. 2015). But what exactly contribute to low mutation rates on these regions with  
 246 large size? Still we don't know. This unknown biological mechanism, depressing the  
 247 nucleotide mutation on these regions, merits for further exploration. Second, from the  
 248 perspective of chromosome Y, we found that the relationship between Sumatran wild  
 249 boar and pigs from Eurasian continents is much closer than that inferred by autosomes.  
 250 Previously, Frantz et al. (2013) have observed the discordant phenomenon of  
 251 conflicting phylogenetic signal between mtDNA and autosomal chromosomes in  
 252 Sumatran wild boar. They explain this phenomenon by sunda-shelf admixture. Our  
 253 results of Chromosome Y confirm the hypothesis and make the whole event of inter-  
 254 specific gene flow more reasonable and much clearer. Third, many Chinese pigs share  
 255 the same haplotype of chromosome Y with European pigs, which is not consistent  
 256 with their deep splitting status on autosome and mtDNA. It is well recognized that

European and Asian pigs are two geographically and genetically distinct identities (Groenen et al. 2012; Frantz et al. 2013). However, Asian germplasm had been deliberately imported to Europe to improve commercial trait in European breeds during the Industrial Revolution (Bosse et al. 2014), resulting in the fact that ~30% of the genomes of European commercial pigs are derived from Chinese breeds (Groenen et al. 2012). Here we show another interesting feature of *Sus scrofa* demography, i.e. ancient hybridization between European and Asian wild boars provided an importance source of male genetic components for Asian (Chinese) domestic pigs. These results collectively depict a complex demographic pattern of *Sus scrofa*, significantly advance our knowledge of pig evolutionary history.

# **Male-driven gene flow on Chromosome Y is not likely a recent but an ancient event**

Given the geographic distance between Europe and Asia, introgression and hybridization between European and Asian domestic pigs were certainly extremely rare before Ferdinand Magellan circumnavigated the globe. More recently, two waves of gene flow between European and Asian domestic pigs have been well documented. One occurred at the onset of Industrial Revolution and early nineteenth centuries. During this period, Asian pigs mainly from South China were introduced into British to improve local breeds, resulting in mosaic modern genomes of British-derived commercial breeds (such as Large White, Landrace and Duroc) that possess ~30% of Asian haplotypes (White 2011; Groenen et al. 2012). Interestingly, the gene flow orientation shifted afterwards. Since the early twentieth centuries, European improved breeds having desirable performance of lean pork production were imported into China via the Russian, British and German colonies. These breeds including Large White, Berkshire, Duroc and Landrace were introgressed into some Chinese

indigenous breeds like Kele and Licha, leaving hybridization signals in the genomes of these breeds (Ai et al. 2014). This raises one possibility that the gene flow observed on chromosome Y could take place after the twentieth centuries via the introgression of European germplasm into Chinese local pigs. This possibility seems to be supported by the observation of very few segregating sites and small Theta and Pi values in Chinese pigs with Eurasian Y haplotype (**Supplemental Table S4**) and of a short branch of these pigs in the Bayesian tree (**Fig. 2C**). However, we can definitely exclude this possibility based on the following four arguments, therefore supporting the conclusion that the male-driven gene flow on chromosome Y is an ancient event before domestication around 24k years ago.

First, nearly all Chinese pig samples used in this study were collected from nucleus herds raised in national conservation farms. These herds are geographically isolated populations. Except for North Chinese domestic pigs, there is a lack of any historical records describing the importation of European breeds into these populations. Indeed, we did not find European ancient lineages in autosomes of most of Chinese domestic pigs in the ADMIXTURE analysis (**Fig. 1C**), which could be detected if there was a recent gene flow between these European and Chinese pigs.

Second, we did not observe any evidence of admixture between European and Chinese domestic pigs on chromosome X. All Chinese pigs with the Eurasian SSCY haplotype do not have the European haplotype of 52 Mb on chromosome X (**Supplemental Fig. S1**). If European germplasm were recently introgressed into Chinese domestic pigs during the last century, it is impossible to retain only Eurasian SSCY segments while completely loss the European chromosome X haplotype in all introgressed individuals via genetic drift or artificial selection within a short time interval of ~100 years. Unlike European commercial breeds, no intensive selection for

specific traits has been documented for Chinese indigenous breeds during the past century.

Third, our mtDNA data show that 20 European pigs (males=9, females=11) including White Duroc, Large White, Landrace and Pietrain have mtDNA of Chinese origin (**Supplemental Table S2**). This is most likely attributable to the recent importation of Chinese breeds to Europe during the 1900s. However, all 134 Chinese pigs (males=71, females=63) lack Europe-originated mtDNA (**Supplemental Table S2**). This also conflicts with the hypothesis of a recent gene flow between European and Chinese domestic pigs.

Forth, we calculated a negative and positive value of Tajima's D for the SSCY haplotype in European pigs (-1.631) and Chinese pigs (2.350) with the Eurasian haplotype, respectively (**Fig. 3**). For a recently introgressed haplotype, a surplus of rare alleles appearing after the introgression usually creates smaller (i.e. more negative) value of Tajima's D. Therefore, it is theoretically expect to obtain a more negative value of D in presumably introgressed Chinese pigs, i.e. those with the Eurasian SSCY haplotype. However, the prediction is contradictory to our observation, thus excluding the possibility of a recent gene flow on SSCY.

Together, we conclude that the male-driven gene flow on SSCY is an ancient event, in which hybridization between European and Asian wild boars occurred before domestication (~24k years ago) and provided an important source of male genetic components for Asian (Chinese) domestic pigs. The very few segregating sites and small values of Theta and Pi in Chinese pigs with the Eurasian SSCY haplotype are most likely due to the unusually evolutionary feature of this region: low mutation rates and no recombination.

## Methods

### Samples and genome sequencing

We sequenced the genomes of 163 Chinese and European pigs, including 24 South Chinese domestic pigs, 33 North Chinese domestic pigs, 36 West Chinese domestic pigs, 33 East Chinese domestic pigs, 6 South Chinese wild boars and 31 European domestic pigs. Of these animals, Chinese pigs were from 16 geographically divergent breeds, European pigs were from 4 commercial breeds (**Supplemental Table S1**), and 59 Chinese pigs have been sequenced in our previous study (Ai et al. 2015).

The genome sequencing was conducted as previously described (Ai et al. 2015). Briefly, genomic DNA was extracted from ear tissues using a standard phenol-chloroform method, and then sheared into fragments of 200-800 bp according to the Illumina DNA sample preparation protocol. These treated fragments were end-repaired, A-tailed, ligated to paired-end adaptors and PCR amplified with 500 bp (or 350 bp) inserts for library construction. Sequencing was performed to generate 100 bp (or 150 bp) paired-end reads on a HiSeq 2000 (or 2500) platform (Illumina) according to the manufacture's standard protocols.

### SNP calling

We downloaded the genome sequence data of 39 pigs, one African warthog (*Phacochoerus africanus*), one Java warty pig (*Sus verrucosus*) and one Celebes warty pig (*Sus celebensis*) from the NCBI SRA database (<https://www.ncbi.nlm.nih.gov/sra>). These data were integrated into the sequence data obtained in this study, resulting in a 205-sample high-quality data set (**Supplemental Table S1 and Supplemental Table S2**). Clean reads from all individuals were aligned to the *Sus scrofa* reference genome (build 10.2) using BWA (Li and Durbin 2009). The mapped reads were subsequently processed by sorting, indel realignment,

357 duplicate marking, and low quality filtering using Picard (<http://picard.sourceforge.net>)  
 358 and GATK (McKenna et al. 2010). Sequencing coverage and depth of each sample  
 359 were calculated using genomcov implemented in Bedtools (Quinlan and Hall 2010).  
 360 A two-round procedure of SNP calling was performed using Platypus (Rimmer et al.  
 361 2014). In the first round, SNPs were individually called with default parameters, and  
 362 high-quality called SNPs were merged together. These merged SNPs were treated as  
 363 known variants to guide the second-round genotyping for all the samples via Platypus  
 364 with parameters of “--source=KnownVariants.vcf.gz --minPosterior=0 --  
 365 getVariantsFromBAMs=0”. All SNPs except those on chromosome Y were filtered  
 366 with the criterion of MAF > 0.001 and SNP call rates > 80%. For SNPs on the Y-  
 367 chromosome, only male individuals were explored to call SNPs under the criterion of  
 368 MAF > 0.001 and call rates > 80%.

### 369 **Population genetic analysis using autosome data**

370 A total of 47,009,938 qualified SNPs on autosomes were used to calculate genetic  
 371 distance among all individuals using Plink as previously described (Ai et al. 2013). A  
 372 neighbor-joining tree was then constructed for all individuals using Neighbor in  
 373 PHYLIP v3.69 (Felsenstein 2005) and visualized by FigTree software  
 374 (<http://beast.bio.ed.ac.uk/FigTree>). Population genetic structure was inferred using the  
 375 Maximum Likelihood approach implemented in ADMIXTURE v1.20 (Alexander et  
 376 al. 2009). The ADMIXTURE program was run in an unsupervised manner with a  
 377 variable number of clusters (K = 2 to 5). Principal component (PC) analysis was  
 378 conducted using Smartpca in EIGENSOFT v6.0 (Price et al. 2006). To avoid artifacts  
 379 caused by linkage disequilibrium (LD), we excluded SNPs with  $r^2 \geq 0.2$  in the PC  
 380 analysis.



TreeMix (Pickrell and Pritchard 2012) was employed to infer the patterns of historical splits and mixtures among Eurasian pig populations in the context of *Suidae*, with no migration events and 5000 SNPs grouping together in a LD block. We inferred demographic history of Eurasian pigs using the Multiple Sequentially Markovian Coalescent (MSMC) method (Schiffels and Durbin 2014). To ensure the quality of consensus sequence, we only used representative samples (n=40) of high sequencing depth for each geographic population (n=20) with parameters set as follow: “-p 2\*2+50\*1+1\*4+1\*6 --fixedRecombination”. The generation time (g) was set as 5 years, and a standard mutation rate ( $\mu$ ) of  $2.5 \times 10^{-8}$  was used as previously described (Groenen et al. 2012).

# **Evolutionary history analysis using chromosome Y data**

The bowtie2 software (Langmead and Salzberg 2012) was employed to align filtered clean reads from all male individuals to the chromosome Y reference sequence (VEGA62 version) (Skinner et al. 2016) with the parameter of “--no-mixed --no-discordant --no-unal”. Then the two-round SNP calling was performed using Platypus (Rimmer et al. 2014) same as for autosomal SNPs. A total of 49,103 SNPs on chromosome Y passed the criterion of  $MAF > 0.001$  and call rates  $> 80\%$ . Shapeit2 (Delaneau et al. 2013) was used to phase these SNPs with the parameters of “-X --burn 14 --prune 16 --main 40”. Phased alleles on the distal and proximal blocks were linked together to form sequences, which were then used to reconstruct a phylogenetic tree using BEAST (Tamura et al. 2013) under the GTR+ $\Gamma$ +I model of evolution. Splitting times and 95% highest posterior density intervals in the tree were estimated using a Bayesian Markov chain Monte Carlo method implemented in BEAST (Tamura et al. 2013) with 1,000,000 MCMC samples. The node age of *Sus verucosus* was set to be 4.2 million years (Frantz et al. 2013) as the calibration constraint.

To investigate global distribution of the haplotypes within the distal and proximal region on chromosome Y, we employed six tagging SNPs representing this region from porcine 60K chip in 426 Eurasian pigs from 82 geographically divergent populations. Pairwise nucleotide differences per site within ( $d_x$ ) and between ( $d_{xy}$ ) populations were calculated as previously described (Ai et al. 2015). Segregating sites, Theta, Pi and Tajima's D values were calculated for autosomes and the SSCY region in 50 kb windows at a step size of 25 kb using c++ library of libsequence (Thornton 2003). A coalescence simulation for the SSCY region was performed in Chinese pigs with the Asian haplotype, Chinese pigs with the Eurasian haplotype and European pigs with the Eurasian haplotype using the ms software (Hudson 2002) under demographic model inferred from the MSMC (Schiffels and Durbin 2014) results without recombination.

## **Data access**

The raw sequence reads from this study have been submitted to the NCBI Sequence Read Archive (SRA; <http://www.ncbi.nlm.nih.gov/sra>) under accession number SUB2302970.

## **Acknowledgements**

This study is financially supported by the National Swine Industry and Technology system of China (nycytX-009), Innovative Research Team in University (IRT1136), and the Natural Science Foundation of Jiangxi Province (20152ACB21001).

## **Author's contributions**

L.H., J.R. and H.A. designed the study. H.A. and J.R. designed the bioinformatics analysis process. H.A. performed the analyses of bioinformatics, population genetics

and evolutionary history. B.Y., J.M., and Z.Z. performed sample collection. W.L. and H.A. performed mapping of raw sequencing reads. H.A., J.R. and L.H. wrote and revised the paper.

### **Competing interests**

The authors declare that they have no competing interest.

### **Figure legends**

#### **Figure 1. Demographic history of Eurasian pigs inferred using autosomal SNP data.**

(A) Geographical locations of Eurasian pigs analyzed in this study. EP, European pigs including Creole, Duroc, Iberian, Large White, Mangalica, Landrace, Pietrain and wild boars; ECDP, East Chinese domestic pigs including Erhualian and Jinhua; WCDP, West Chinese domestic pigs including Baoshan, Neijiang and Tibetan pigs in Yunnan and Sichuan provinces; SCDP, South Chinese domestic pigs including Bamaxiang, Luchuan and Wuzhishan; NCDP, North Chinese domestic pigs including Bamei, Hetao, Laiwu and Min; CWB, Chinese wild boars. (B) Neighbor joining phylogenetic tree of all sequenced pigs. SWB, Sumatran wild boars. *S. celebensis* (Celebes wild boar), *S. verrucosus* (Java warty pig) and *P. africanus* (African warthog) were used as outgroups. (C) ADMIXTURE analysis with  $K = 2-5$ . Colors in each column represent ancestry proportion. (D) Principal component analysis plots based on the first two principal components. (E) Relationships among Eurasian pigs inferred using Treemix. (F) Effective population sizes of Eurasian pigs inferred using MSMC. The period of the Last Glacial Maximum (LGM; ~20,000 years ago) is shaded in grey.

**Figure 2. Demographic history of Eurasian pigs based on the data of chromosome Y.**

(A) The pattern of haplotype on chromosome Y sharing in Eurasian pigs. The haplotypes were reconstructed for each individual using all qualified SNPs on the Y chromosome. Alleles that are identical or different from the ones on the VEGA62 reference genome are indicated by orange or blue, respectively. (B) The plots of  $d_x$  and  $d_{xy}$  (the number of pairwise differences per site) statistics in a window size of 200 kb on chromosome Y. These statistics were calculated for pigs with the Eurasian or Asian haplotypes. U\_Y indicates the unmapped contig on chromosome Y. (C) Bayesian trees of Eurasian pigs constructed using SNP data of the SSCY region and mtDNA, and neighbor-joining tree of these pigs based on autosomal data. Inferred divergence time is shown in Y-axis of the Bayesian trees. The abbreviations of EP, ECDP, NCDP, WCDP, CWB, SCDP and SWB are as in **Figure 1**. *S. verrucosus* (Java warty pig) was set as outgroup. (D) The geographical distribution of the Eurasian (red) and Asian (blue) haplotypes within the proximal and distal region on the Y chromosome (the SSCY region) in Eurasian pigs. The two haplotypes were phased using six tagging SNPs on the porcine 60K Chip (Illumina) within this region. ISEA haplotype (black), the haplotype found in a Sumatran wild boar.

**Figure 3. Comparison of nucleotide variability within the proximal and distal region on the Y chromosome and on autosomes.**

Statistics of segregation sites, theta, Pi and Tajima's D values were calculated in a window size of 50 kb for European pigs with the Eurasian haplotype, Chinese pigs with the Eurasian haplotype and Chinese pigs with the Asian haplotype on the Y chromosome, respectively.

480 **Table**

481 **Table 1. Time estimates for the  $T_{MRCA}$  of phylogenetic nodes of particular**  
 482 **interest on the SSCY region**

| Node                                                        | Time estimate of<br>$T_{MRCA}$ (Million years) | 95% highest posterior<br>density (HPD) interval |
|-------------------------------------------------------------|------------------------------------------------|-------------------------------------------------|
| All the <i>Sus scrofa</i>                                   | 1.070                                          | 0.945-1.156                                     |
| Sumatran wild boar and Chinese pigs<br>with Asian haplotype | 0.903                                          | 0.778-0.977                                     |
| All the pigs with Asian haplotype                           | 0.136                                          | 0.111-0.152                                     |
| All the pigs with Eurasian haplotype                        | 0.102                                          | 0.087-0.125                                     |
| Chinese pigs with Eurasian haplotype                        | 0.024                                          | 0.016-0.030                                     |

483

484 **Supplemental materials**

485 **Supplemental Table S1.**

486 Samples used in this study. See excel file “Supplemental Table S1.xlsx”.

487 **Supplemental Table S2.**

488 Sequencing statistics of 205 samples used in this study. See excel file “Supplemental  
 489 Table S2.xlsx”.

490 **Supplemental Table S3.**

491 The geographical distribution of the two haplotypes in a large panel of 426 male pigs  
 492 from the global. See excel file “Supplemental Table S3.xlsx”.

493 **Supplemental Table S4.**

494 Z-test showing that gene drift is not likely a cause of the two haplotypes on  
 495 chromosome Y in Eurasian pigs. See excel file “Supplemental Table S4.xlsx”.

496 **Supplemental Table S5.**

497 Coalescent simulations showing that gene drift is not likely a cause of the two  
498 haplotypes on chromosome Y in Eurasian pigs. See excel file “Supplemental Table  
499 S5.xlsx”.

# 500 **Supplemental Fig. S1**

501 **The pattern of haplotype on the X chromosome sharing in Eurasian pigs.** The  
502 haplotypes were reconstructed for each individual using all qualified SNPs on this  
503 chromosome. Alleles that are identical or different from the ones on the Duroc  
504 reference genome are indicated by orange or blue, respectively. The abbreviations of  
505 EP, NCDP, ECDP, WCDP, SCDP and CWB are as in **Figure 1**.

506

507

# 508 **References**

509 Ai H, Fang X, Yang B, Huang Z, Chen H, Mao L, Zhang F, Zhang L, Cui L, He W et  
510 al. 2015. Adaptation and possible ancient interspecies introgression in pigs  
511 identified by whole-genome sequencing. *Nature genetics* **47**: 217-225.

512 Ai H, Huang L, Ren J. 2013. Genetic diversity, linkage disequilibrium and selection  
513 signatures in chinese and Western pigs revealed by genome-wide SNP markers.  
514 *PLoS One* **8**: e56001.

515 Ai H, Yang B, Li J, Xie X, Chen H, Ren J. 2014. Population history and genomic  
516 signatures for high-altitude adaptation in Tibetan pigs. *BMC Genomics* **15**: 834.

517 Alexander DH, Novembre J, Lange K. 2009. Fast model-based estimation of ancestry  
518 in unrelated individuals. *Genome Res* **19**: 1655-1664.

519 Andersson L, Haley CS, Ellegren H, Knott SA, Johansson M, Andersson K,  
520 Andersson-Eklund L, Edfors-Lilja I, Fredholm M, Hansson I et al. 1994.  
521 Genetic mapping of quantitative trait loci for growth and fatness in pigs.

522           *Science* **263**: 1771-1774.

523   Bosse M, Megens HJ, Frantz LA, Madsen O, Larson G, Paudel Y, Duijvesteijn N,  
524           Harlizius B, Hagemeijer Y, Crooijmans RP et al. 2014. Genomic analysis  
525           reveals selection for Asian genes in European pigs following human-mediated  
526           introgression. *Nat Commun* **5**: 4392.

527   Delaneau O, Zagury JF, Marchini J. 2013. Improved whole-chromosome phasing for  
528           disease and population genetic studies. *Nat Methods* **10**: 5-6.

529   Drummond AJ, Suchard MA, Xie D, Rambaut A. 2012. Bayesian phylogenetics with  
530           BEAUti and the BEAST 1.7. *Mol Biol Evol* **29**: 1969-1973.

531   Ekser B, Ezzelarab M, Hara H, van der Windt DJ, Wijkstrom M, Bottino R, Trucco M,  
532           Cooper DK. 2012. Clinical xenotransplantation: the next medical revolution?  
533           *Lancet* **379**: 672-683.

534   Eventov-Friedman S, Tchorsh D, Katchman H, Shezen E, Aronovich A, Hecht G,  
535           Dekel B, Rechavi G, Blazar BR, Feine I et al. 2006. Embryonic pig pancreatic  
536           tissue transplantation for the treatment of diabetes. *PLoS Med* **3**: e215.

537   Fang X, Mou Y, Huang Z, Li Y, Han L, Zhang Y, Feng Y, Chen Y, Jiang X, Zhao W et  
538           al. 2012. The sequence and analysis of a Chinese pig genome. *Gigascience* **1**:  
539           16.

540   Felsenstein J. 2005. PHYLIP (Phylogeny Inference Package) Version 3.6. Distributed  
541           by the author, Department of Genome Sciences, University of Washington,  
542           Seattle.

543   Frantz LA, Schraiber JG, Madsen O, Megens HJ, Bosse M, Paudel Y, Semiadi G,  
544           Meijaard E, Li N, Crooijmans RP. 2013. Genome sequencing reveals fine  
545           scale diversification and reticulation history during speciation in *Sus*. *Genome*  
546           *Biology* **14**: 1719-1728.

Frantz LA, Schraiber JG, Madsen O, Megens HJ, Cagan A, Bosse M, Paudel Y, Crooijmans RP, Larson G, Groenen MA. 2015. Evidence of long-term gene flow and selection during domestication from analyses of Eurasian wild and domestic pig genomes. *Nature genetics* **47**: 1141-1148.

Giuffra E, Kijas JM, Amarger V, Carlborg O, Jeon JT, Andersson L. 2000. The origin of the domestic pig: independent domestication and subsequent introgression. *Genetics* **154**: 1785-1791.

Groenen MA. 2016. A decade of pig genome sequencing: a window on pig domestication and evolution. *Genet Sel Evol* **48**: 23.

Groenen MA Archibald AL Uenishi H Tuggle CK Takeuchi Y Rothschild MF Rogel-Gaillard C Park C Milan D Megens HJ et al. 2012. Analyses of pig genomes provide insight into porcine demography and evolution. *Nature* **491**: 393-398.

Hudson RR. 2002. Generating samples under a Wright-Fisher neutral model of genetic variation. *Bioinformatics* **18**: 337-338.

Kijas JM, Andersson L. 2001. A phylogenetic study of the origin of the domestic pig estimated from the near-complete mtDNA genome. *J Mol Evol* **52**: 302-308.

Langmead B, Salzberg SL. 2012. Fast gapped-read alignment with Bowtie 2. *Nat Methods* **9**: 357-359.

Langmead B, Trapnell C, Pop M, Salzberg SL. 2009. Ultrafast and memory-efficient alignment of short DNA sequences to the human genome. *Genome Biol* **10**: R25.

Larson G, Cucchi T, Fujita M, Matisoosmith E, Robins J, Anderson A, Rolett B, Spriggs M, Dolman G, Kim TH. 2007. Phylogeny and ancient DNA of *Sus* provides insights into neolithic expansion in Island Southeast Asia and Oceania. *Proceedings of the National Academy of Sciences* **104**: 4834-4839.



572 Larson G, Dobney K, Albarella U, Fang M, Matissoosmith E, Robins J, Lowden S,  
573 Finlayson H, Brand T, Willerslev E. 2005. Worldwide phylogeography of wild  
574 boar reveals multiple centers of pig domestication. *Science* **307**: 1618-1621.

575 Li H, Durbin R. 2009. Fast and accurate short read alignment with Burrows-Wheeler  
576 transform. *Bioinformatics* **25**: 1754-1760.

577 Li M, Chen L, Tian S, Lin Y, Tang Q, Zhou X, Li D, Yeung CK, Che T, Jin L et al.  
578 2016. Comprehensive variation discovery and recovery of missing sequence in  
579 the pig genome using multiple de novo assemblies. *Genome Res*  
580 doi:10.1101/gr.207456.116.

581 Li M, Tian S, Jin L, Zhou G, Li Y, Zhang Y, Wang T, Yeung CK, Chen L, Ma J et al.  
582 2013. Genomic analyses identify distinct patterns of selection in domesticated  
583 pigs and Tibetan wild boars. *Nature genetics* **45**: 1431-1438.

584 Ma J, Yang J, Zhou L, Ren J, Liu X, Zhang H, Yang B, Zhang Z, Ma H, Xie X et al.  
585 2014. A splice mutation in the PHKG1 gene causes high glycogen content and  
586 low meat quality in pig skeletal muscle. *PLoS Genet* **10**: e1004710.

587 McKenna A, Hanna M, Banks E, Sivachenko A, Cibulskis K, Kerytsky A, Garimella  
588 K, Altshuler D, Gabriel S, Daly M et al. 2010. The Genome Analysis Toolkit:  
589 a MapReduce framework for analyzing next-generation DNA sequencing data.  
590 *Genome Res* **20**: 1297-1303.

591 Meurens F, Summerfield A, Nauwynck H, Saif L, Gerds V. 2012. The pig: a model  
592 for human infectious diseases. *Trends Microbiol* **20**: 50-57.

593 Milan D, Jeon JT, Looft C, Amarger V, Robic A, Thelander M, Rogel-Gaillard C, Paul  
594 S, Iannuccelli N, Rask L et al. 2000. A mutation in PRKAG3 associated with  
595 excess glycogen content in pig skeletal muscle. *Science* **288**: 1248-1251.

596 Noce A, Amills M, Manunza A, Muwanika V, Muhangi D, Aliro T, Mayega J,

597 Ademun R, Sanchez A, Egbhalsaid S et al. 2015. East African pigs have a  
598 complex Indian, Far Eastern and Western ancestry. *Anim Genet* **46**: 433-436.

599 Ottoni C, Flink LG, Evin A, Georg C, De Cupere B, Van Neer W, Bartosiewicz L,  
600 Linderholm A, Barnett R, Peters J et al. 2013. Pig domestication and human-  
601 mediated dispersal in western Eurasia revealed through ancient DNA and  
602 geometric morphometrics. *Mol Biol Evol* **30**: 824-832.

603 Pickrell JK, Pritchard JK. 2012. Inference of population splits and mixtures from  
604 genome-wide allele frequency data. *PLoS Genet* **8**: e1002967.

605 Poznik GD, Xue Y, Mendez FL, Willems TF, Massaia A, Wilson Sayres MA, Ayub Q,  
606 McCarthy SA, Narechania A, Kashin S et al. 2016. Punctuated bursts in  
607 human male demography inferred from 1,244 worldwide Y-chromosome  
608 sequences. *Nature genetics* **48**: 593-599.

609 Price AL, Patterson NJ, Plenge RM, Weinblatt ME, Shadick NA, Reich D. 2006.  
610 Principal components analysis corrects for stratification in genome-wide  
611 association studies. *Nature genetics* **38**: 904-909.

612 Quinlan AR, Hall IM. 2010. BEDTools: a flexible suite of utilities for comparing  
613 genomic features. *Bioinformatics* **26**: 841-842.

614 Ramirez O, Ojeda A, Tomas A, Gallardo D, Huang LS, Folch JM, Clop A, Sanchez A,  
615 Badaoui B, Hanotte O et al. 2009. Integrating Y-chromosome, mitochondrial,  
616 and autosomal data to analyze the origin of pig breeds. *Mol Biol Evol* **26**:  
617 2061-2072.

618 Rimmer A, Phan H, Mathieson I, Iqbal Z, Twigg SR, Consortium WGS, Wilkie AO,  
619 McVean G, Lunter G. 2014. Integrating mapping-, assembly- and haplotype-  
620 based approaches for calling variants in clinical sequencing applications.  
621 *Nature genetics* **46**: 912-918.

622 Schiffels S, Durbin R. 2014. Inferring human population size and separation history  
623 from multiple genome sequences. *Nature genetics* **46**: 919-925.

624 Shannon LM, Boyko RH, Castelhana M, Corey E, Hayward JJ, McLean C, White ME,  
625 Abi Said M, Anita BA, Bondjengo NI et al. 2015. Genetic structure in village  
626 dogs reveals a Central Asian domestication origin. *Proc Natl Acad Sci U S A*  
627 **112**: 13639-13644.

628 Skinner BM, Sargent CA, Churcher C, Hunt T, Herrero J, Loveland JE, Dunn M,  
629 Louzada S, Fu B, Chow W et al. 2016. The pig X and Y Chromosomes:  
630 structure, sequence, and evolution. *Genome Res* **26**: 130-139.

631 Tamura K, Stecher G, Peterson D, Filipski A, Kumar S. 2013. MEGA6: Molecular  
632 Evolutionary Genetics Analysis version 6.0. *Mol Biol Evol* **30**: 2725-2729.

633 Thornton K. 2003. Libsequence: a C++ class library for evolutionary genetic analysis.  
634 *Bioinformatics* **19**: 2325-2327.

635 Uimari P, Sironen A, Sevon-Aimonen ML. 2011. Whole-genome SNP association  
636 analysis of reproduction traits in the Finnish Landrace pig breed. *Genet Sel*  
637 *Evol* **43**: 42.

638 Vamathevan JJ, Hall MD, Hasan S, Woollard PM, Xu M, Yang Y, Li X, Wang X,  
639 Kenny S, Brown JR et al. 2013. Minipig and beagle animal model genomes  
640 aid species selection in pharmaceutical discovery and development. *Toxicol*  
641 *Appl Pharmacol* **270**: 149-157.

642 Wallner B, Vogl C, Shukla P, Burgstaller JP, Druml T, Brem G. 2013. Identification of  
643 genetic variation on the horse y chromosome and the tracing of male founder  
644 lineages in modern breeds. *PLoS One* **8**: e60015.

645 Wang L, Wang A, Wang L, Li K, Yang G, He R, Qian L, Xu N, Huang R, Peng Z et al.  
646 2011. Animal Genetic Resources in China: Pigs. *Beijing: China Agricultural*

647 *Press In Chinese.*

648 White S. 2011. From globalized pig breeds to capitalist pigs: a study in animal

649 cultures and evolutionary history. *Environmental History* **16**: 94-120.

650

651

652

653

654 **Fig. 1**

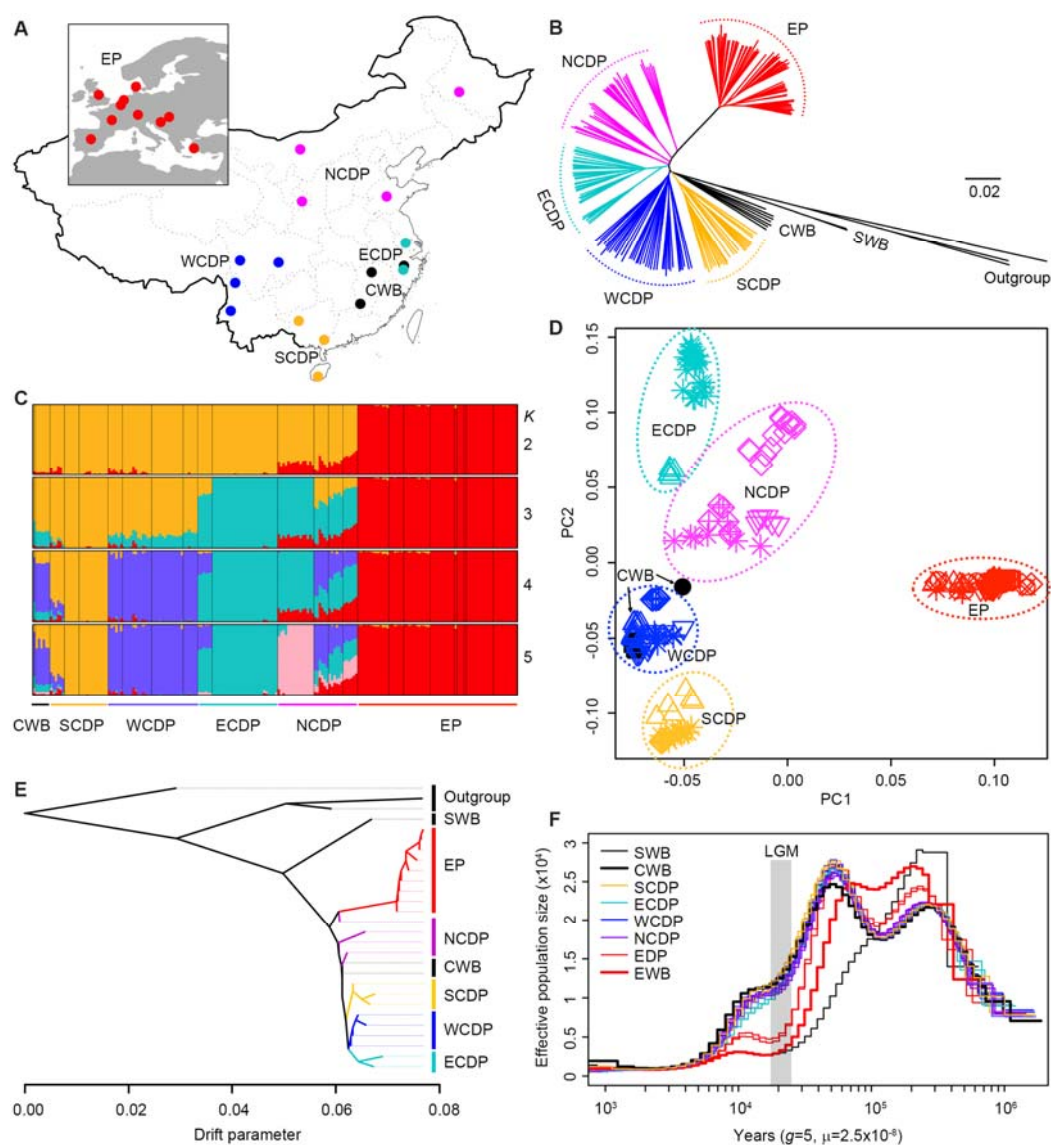

658 **Fig. 2**

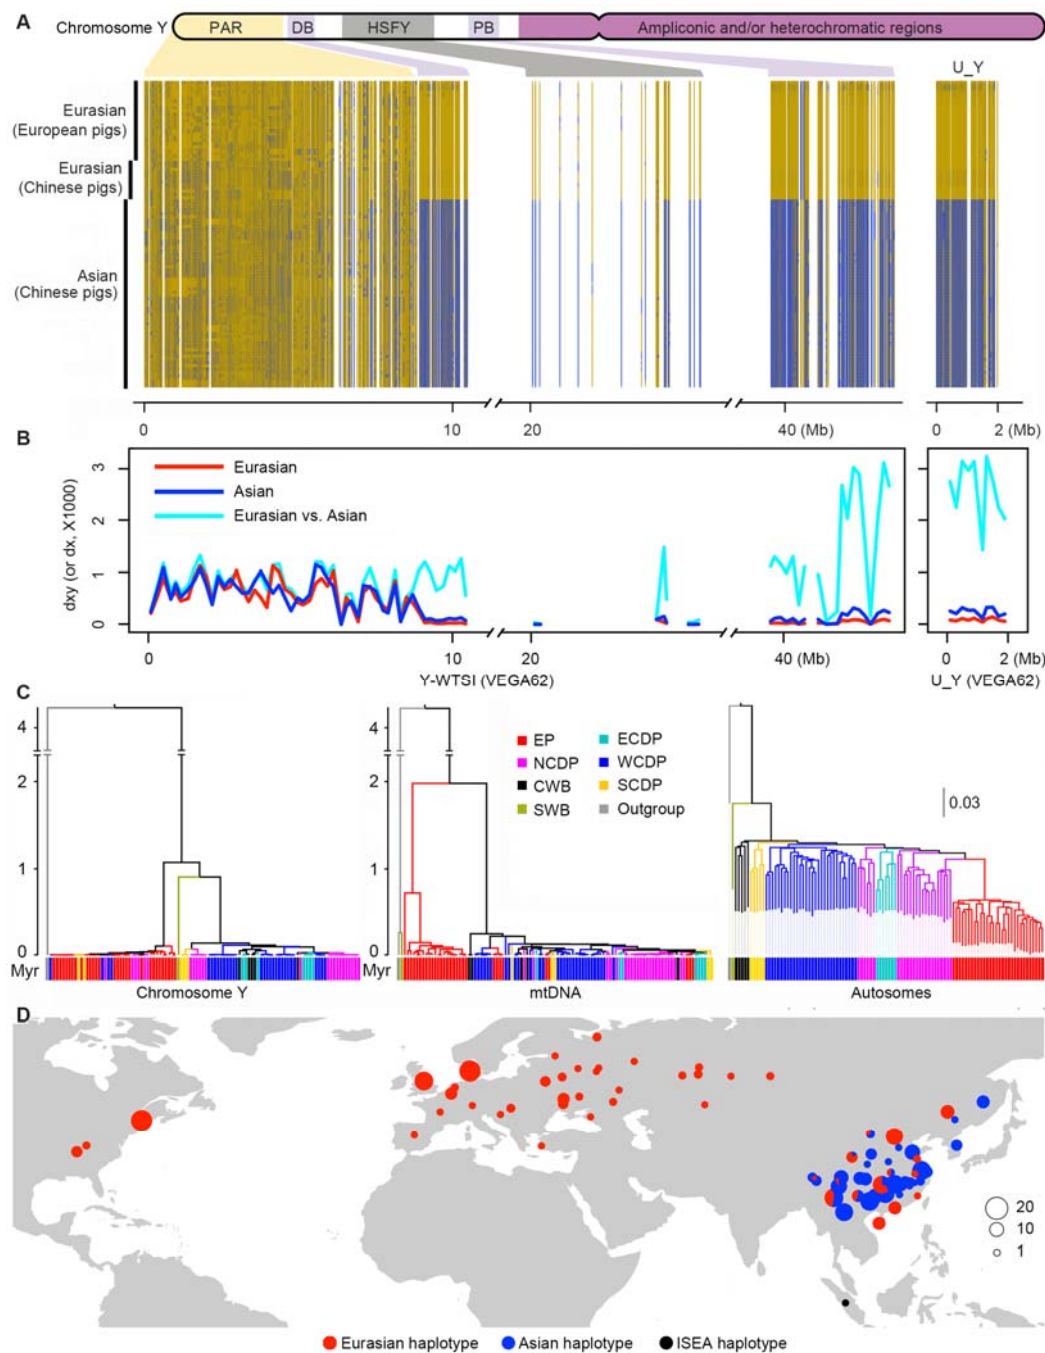

663 **Fig. 3**

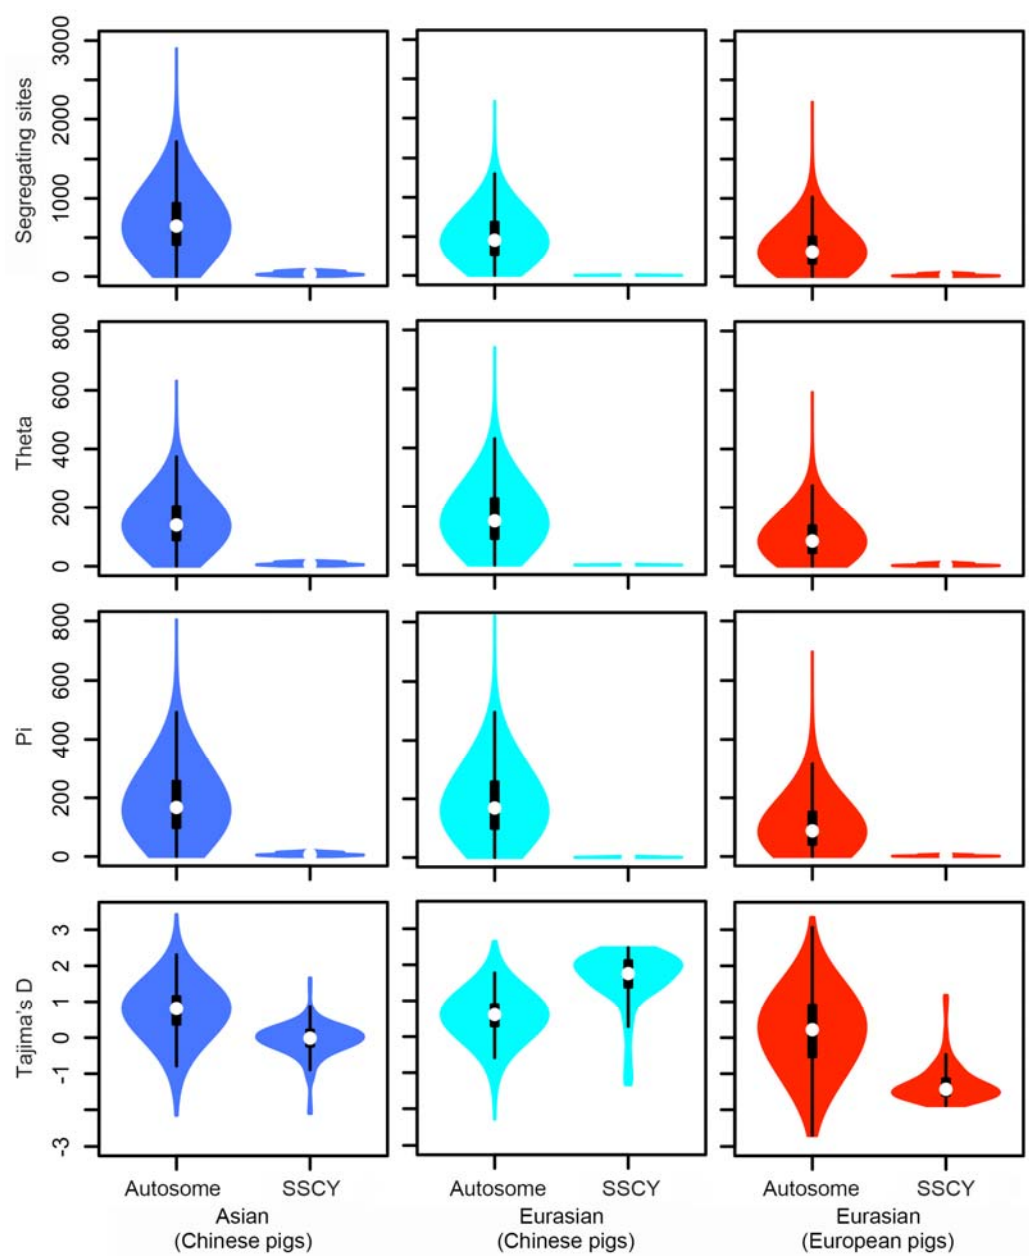

664

665

666



667 **Supplemental Fig. S1**

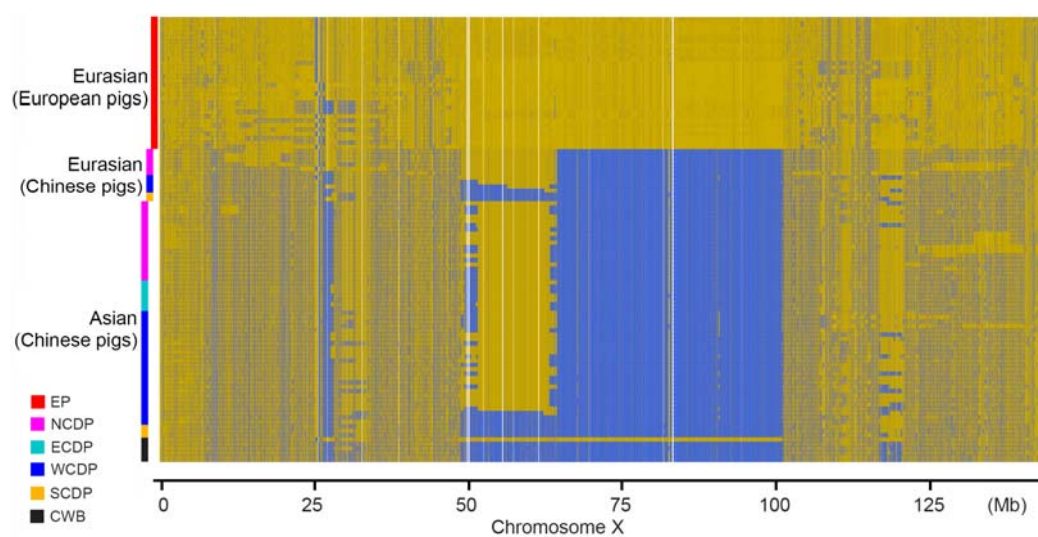

Source: http://biorxiv.org/content/10.1101/126060v1.full.pdf
